# Supplementary material
Source: PubMed Central journal article supplement (PMC3230662)
Supplement: NIHMS329600-supplement-2_si_002.pdf [file NIHMS329600-supplement-2_si_002.pdf]

**Supporting Information for**  
**“Quantitative Proteomic Analysis Revealed**  
**Lovastatin-induced Perturbation of Cellular Pathways in**  
**HL-60 Cells”**

**by**

Xiaoli Dong, Yongsheng Xiao and Yinsheng Wang

**Table of Contents**

---

|                 |                                                                             |
|-----------------|-----------------------------------------------------------------------------|
| <b>Table S2</b> | Modest changed proteins involved in ER signaling and ubiquitination pathway |
| <b>Table S3</b> | Quantification results for elongation factors and ribosomal proteins.       |

---

**Table S2. Modest changed proteins involved in ER signaling and ubiquitination pathway**

| Accession NO. | Protein Name                                                                              | Pathway involved | Average ratio |
|---------------|-------------------------------------------------------------------------------------------|------------------|---------------|
| IPI00217949   | Ubiquitin-conjugating enzyme E2 S                                                         | ubiquitination   | 0.707 ± 0.109 |
| IPI00071189   | Cell division cycle 2-like protein kinase 1                                               | ubiquitination   | 0.714 ± 0.007 |
| IPI00291946   | Deubiquitinating enzyme 10                                                                | ubiquitination   | 0.728 ± 0.162 |
| IPI00830108   | DnaJ homolog subfamily C member 2                                                         | ubiquitination   | 0.706 ± 0.036 |
| IPI00940896   | cDNA FLJ54183, highly similar to HLA class I histocompatibility antigen, Cw-7 alpha chain | ubiquitination   | 0.723 ± 0.227 |
| IPI00299635   | Baculoviral IAP repeat-containing protein 6                                               | ubiquitination   | 0.725 ± 0.254 |
| IPI00102313   | Steroid receptor RNA activator 1                                                          | ER signaling     | 0.743 ± 0.050 |
| IPI00829826   | Activator-recruited cofactor 205 kDa component                                            | ER signaling     | 0.705 ± 0.030 |
| IPI00004068   | Activator-recruited cofactor 240 kDa component                                            | ER signaling     | 0.710 ± 0.030 |
| IPI00032879   | Adenylate kinase isoenzyme 6                                                              | ER signaling     | 0.782 ± 0.044 |

**Table S3. Quantification results for translation elongation factors.**

| <b>IPI Number</b> | <b>Protein Name</b>                                                                                                 | <b>Reverse<br/>set1</b> | <b>Forward<br/>set 2</b> | <b>Forward<br/>set 3</b> | <b>Average<br/>Ratio</b> | <b>SD</b> |
|-------------------|---------------------------------------------------------------------------------------------------------------------|-------------------------|--------------------------|--------------------------|--------------------------|-----------|
| IPI00014263       | Eukaryotic translation initiation factor 4H                                                                         | 0.789                   | 0.569                    | 0.518                    | 0.625                    | 0.144     |
| IPI00178440       | Elongation factor 1-beta                                                                                            | 0.728                   | 0.676                    | 0.761                    | 0.722                    | 0.043     |
| IPI00299254       | Eukaryotic translation initiation factor 5B                                                                         | 0.827                   | 0.662                    | 0.873                    | 0.787                    | 0.111     |
| IPI00102069       | Eukaryotic translation initiation factor 3 subunit M<br>cDNA FLJ56180, highly similar to Negative elongation factor | 0.690                   | 0.842                    | 0.922                    | 0.818                    | 0.118     |
| IPI00000858       | E                                                                                                                   | 0.689                   | 0.820                    | 0.752                    | 0.753                    | 0.065     |
| IPI00925413       | EIF4G1 protein                                                                                                      | 0.688                   | 0.530                    | 0.797                    | 0.671                    | 0.134     |
| IPI00290460       | eIF3 p42                                                                                                            | 0.705                   | 0.620                    | 0.745                    | 0.690                    | 0.064     |
|                   |                                                                                                                     |                         |                          | Average<br>Ratio         | 0.724                    |           |
